# Supplementary material
Source: PubMed Central journal article supplement (PMC10231194)
Supplement: jvi.00054-23-s0001.pdf [file jvi.00054-23-s0001.pdf]

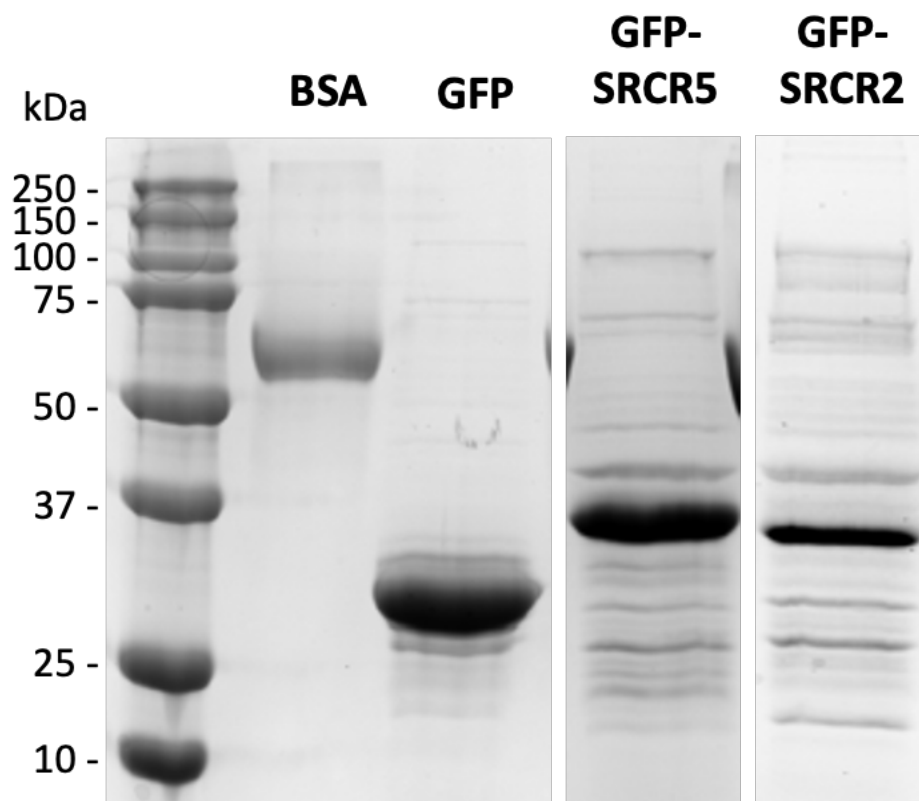

**Fig. S1:** Coomassie staining of the SDS-PAGE gel electrophoresis of the purified GFP, GFP-SRCR5 and GFP-SRCR2 proteins, BSA (bovine serum albumin) were used as expression control.

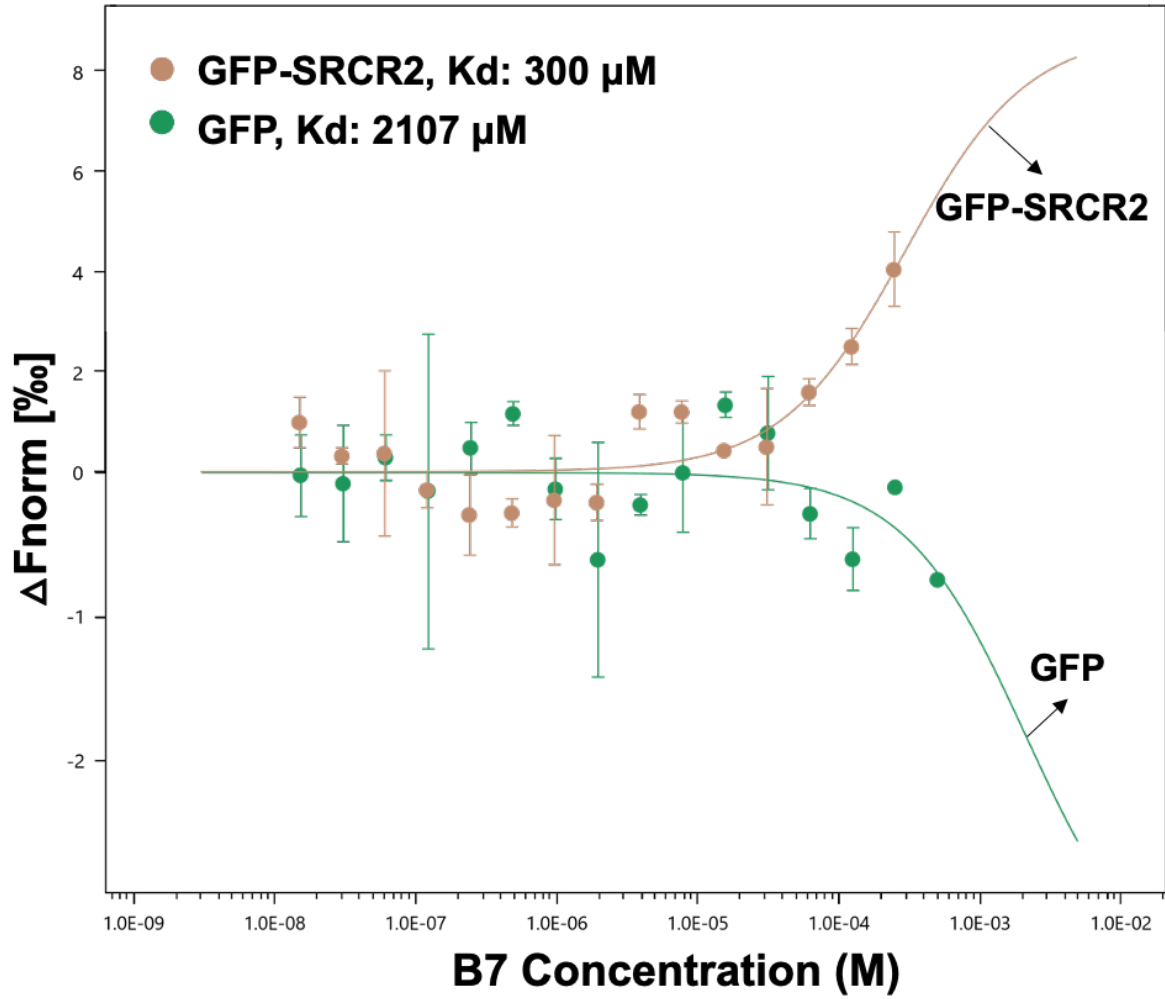

**Fig. S2:** MST analysis of GFP and GFP-fused SRRCR2 thermal dynamic association with ligand B7. Values represent Mean, N=3.

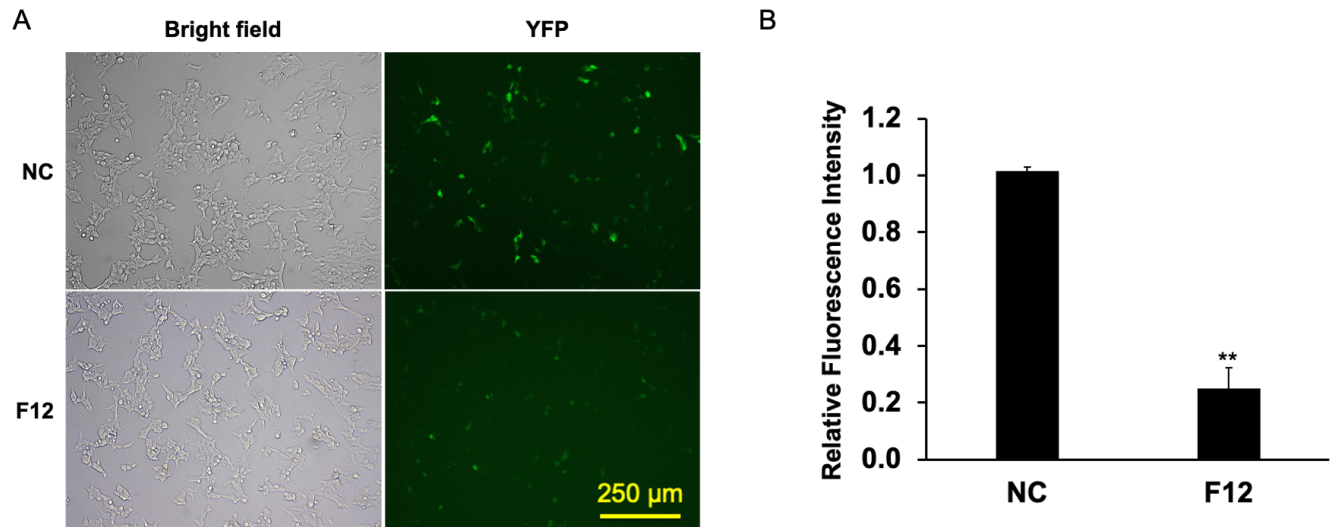

**Fig. S3:** BiFC assay for F12 at pH 6.0.

A) BiFC images for 5  $\mu$ M F12 that inhibit the PPI between SRCR5-VN and GP2a-VC proteins. NC: DMSO Ctrl. Bar = 250  $\mu$ m;

B) Relative fluorescence intensity of the SRCR5/GP2a BiFC results for 5  $\mu$ M F12. Mean $\pm$ SD, n=3.

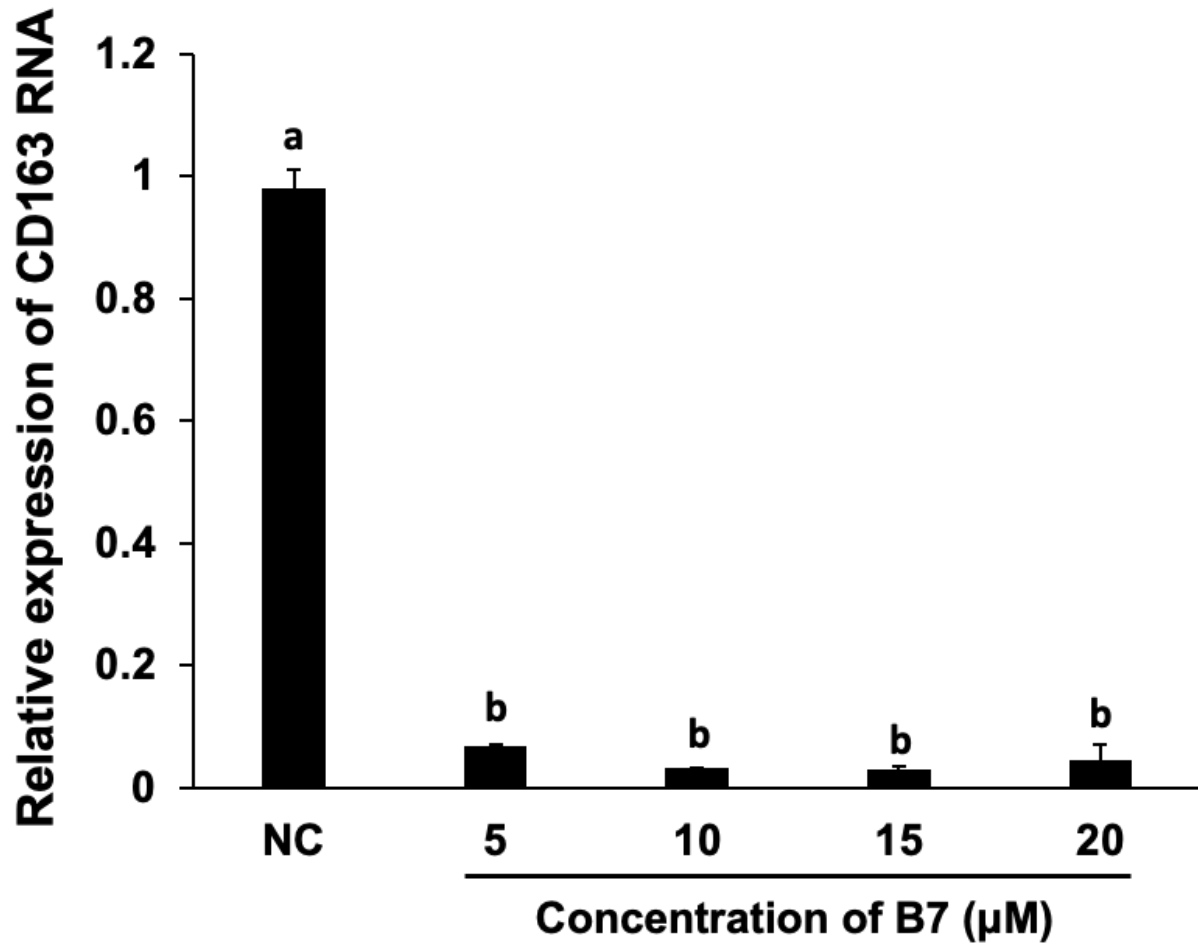

**Fig. S4:** Relative expression of CD163 in PAMs treated with B7 for 24 h. Mean±SD, n=3. P values are calculated by one-way ANOVA and letters on the top of bars indicate significant differences in Tukey post-hoc test.

**Table. S2 Primers for qRT-PCR**

| <b>Target</b> |         | <b>Sequence (5' → 3')</b> |
|---------------|---------|---------------------------|
| Lelystad-     | Forward | AAGATGACATCCGGCACCAC      |
|               | Reverse | CCGGCAGCATAAACTCAACCTG    |
| NADC30        | Forward | GGATGGCCAGCCAGTCAATC      |
|               | Reverse | TGACGTCATCTTCAGTCGCTAGAG  |
| VR-2332       | Forward | AAACCAGTCCAGAGGCAAGG      |
|               | Reverse | GCAAACATAAACTCCACAGTGTA   |
| GAPDH         | Forward | CATCCTGGGCTACACTGAGG      |
|               | Reverse | GCTTGACGAAGTGGTCGTTG      |
